# Supplementary material
Source: PubMed Central journal article supplement (PMC10361397)
Supplement: NIHMS1909506-supplement-1.pdf [file NIHMS1909506-supplement-1.pdf]

# Supplementary Material: Growth Feedback Confers Cooperativity in Resource-Competing Synthetic Gene Circuits

Juan Ramon Melendez-Alvarez, Rong Zhang, Xiao-Jun Tian

---

---

## 1. Model Analysis for the Model Without Metabolic Burden

$$\frac{dx_1}{dt} = \frac{v_1 R_1}{\frac{R_1}{Q_1} + \frac{R_2}{Q_2} + 1} - d_1 x_1 - k g_0 x_1 \quad (1a)$$

$$\frac{dx_2}{dt} = \frac{v_2 R_2}{\frac{R_1}{Q_1} + \frac{R_2}{Q_2} + 1} - d_2 x_2 - k g_0 x_2 \quad (1b)$$

### *Steady States*

The steady state for the system 1 is given by:

$$x_{1ss} = \frac{Q_1 Q_2 R_1 v_1}{(d_{01} + k g_0)(Q_1 Q_2 + Q_1 R_2 + Q_2 R_1)} \quad (2)$$

$$x_{2ss} = \frac{Q_1 Q_2 R_2 v_2}{(d_{02} + k g_0)(Q_1 Q_2 + Q_1 R_2 + Q_2 R_1)} \quad (3)$$

### *Steady States Analysis*

**Proposition 1:** There is no cooperativity between two constitutive gene module competing for resource in an host-circuit system without growth feedback.

Notice that for all values of  $R_1 > 0$ ,  $\frac{dx_{2ss}}{dR_1} < 0$  (see 4). Therefore, if the  $R_1$  term of module-1 increase the steady state of module-2 decreases.

$$\frac{dx_{2ss}}{dR_1} = - \frac{Q_1 Q_2^2 R_2 v_2}{(d_2 + k g_0)(Q_1(Q_2 + R_2) + Q_2 R_1)^2} \quad (4)$$

## 2. Model Analysis for the System with Metabolic Burden

The differential equations for the synthetic gene circuit with of two constitute modules is given by:

$$\frac{dx_1}{dt} = \frac{v_1 R_1}{\frac{R_1}{Q_1} + \frac{R_2}{Q_2} + 1} - d_1 x_1 - \frac{kg_0 x_1}{\frac{R_1}{Q_1} + \frac{R_2}{Q_2} + 1} \quad (5a)$$

$$\frac{dx_2}{dt} = \frac{v_2 R_2}{\frac{R_1}{Q_1} + \frac{R_2}{Q_2} + 1} - d_2 x_2 - \frac{kg_0 x_2}{\frac{R_1}{Q_1} + \frac{R_2}{Q_2} + 1} \quad (5b)$$

### Steady States

In order to find the steady state for system 5, we set the equations equal to zero and solve with respect to  $x_1$  and  $x_2$ , respectively. The steady state are given by:

$$x_{1ss} = \frac{Q_1 Q_2 R_1 v_1 \left( \left( \frac{R_1}{J_1} + \frac{R_2}{J_2} \right) + 1 \right)}{(Q_1(Q_2 + R_2) + Q_2 R_1) \left( d_{01} \left( \frac{R_1}{J_1} + \frac{R_2}{J_2} \right) + d_{01} + kg_0 \right)} \quad (6)$$

$$x_{2ss} = \frac{Q_1 Q_2 R_2 v_2 \left( \left( \frac{R_1}{J_1} + \frac{R_2}{J_2} \right)^m + 1 \right)}{(Q_1(Q_2 + R_2) + Q_2 R_1) \left( d_{02} \left( \frac{R_1}{J_1} + \frac{R_2}{J_2} \right)^m + d_{02} + kg_0 \right)} \quad (7)$$

### 2.1. Cooperative Condition

**Proposition 2:** Two constitutive gene module competing for resource can cooperate with each order under growth feedback, if the following parameter condition is satisfied.

$$\frac{Q_2}{Q_1(Q_2 + R_2)} \leq \frac{J_2}{J_1(J_2 + R_2)} \frac{J_2 kg_0}{J_2 kg_0 + d_2(J_2 + R_2)} \quad (8)$$

For the symmetry case where  $J_1 = J_2 = J$ , and  $Q_1 = Q_2 = Q$ , the condition is:

$$\frac{1}{(Q + R_2)} \leq \frac{1}{(J + R_2)} \frac{J kg_0}{J kg_0 + d_2(J + R_2)} \quad (9)$$

If the condition above is satisfied, there exist range of  $R_1 \in (0, R_{1max})$ , where  $\frac{dx_2}{dR_1} > 0$ . Therefore, if the  $R_1 \in (0, R_{1max})$  is increase the module-1 and module-2 steady states increases.  $R_{1max}$  is given by:

$$R_{1max} = \frac{\sqrt{d_2 J_1 J_2^3 kg_0 Q_2 (J_2 Q_1 (Q_2 + R_2) - J_1 Q_2 (J_2 + R_2)) - d_2 J_1 J_2 Q_2 (J_2 + R_2)}}{d_2 J_2^2 Q_2} \quad (10)$$

Notice that if the Condition 8 is satisfied, there is only one positive critical value (a local maximum) for  $x_{2ss}$  with respect to  $R_1$ , that is  $\frac{dx_{2ss}}{dt} = 0$ , where  $R_1 = R_{1max} \geq 0$ . Then, evaluating  $\frac{dx_{2ss}}{dR_1}$  for  $R_1 = 0$ , we get:

$$\left. \frac{dx_{2ss}}{dR_1} \right|_{R_1=0} = - \frac{Q_2 R_2 v_2 (d_2 J_1 Q_2 (J_2 + R_2)^2 + J_2 k g_0 (J_1 Q_2 (J_2 + R_2) - J_2 Q_1 (Q_2 + R_2)))}{J_1 Q_1 (Q_2 + R_2)^2 (d_2 (J_2 + R_2) + J_2 k g_0)^2} \quad (11)$$

The right hand side of Equation 11 is positive if Condition 8 is satisfied. Therefore, if  $R_1 \in (0, R_{1max})$ , then  $\frac{dx_{2ss}}{dR_1} > 0$ .

### 3. Parameter Values

| Module 1   |        | Module 2   |        |
|------------|--------|------------|--------|
| Parameters | Values | Parameters | Values |
| $v_1$      | 0.5    | $v_2$      | 0.5    |
| $Q_1$      | 75     | $Q_2$      | 75     |
| $J_1$      | 1      | $J_2$      | 1      |
| $d_1$      | 0.25   | $d_2$      | 0.25   |
| $R_1$      | 7.5    | $R_2$      | 7.5    |

Table S1: Parameter Values for the Synthetic Gene Circuit with Two Constitutive Modules, with  $k_{g_0} = 5$

| Module 1   |        | Module 2   |        |
|------------|--------|------------|--------|
| Parameters | Values | Parameters | Values |
| $v_1$      | 0.67   | $v_2$      | 0.5    |
| $Q_1$      | 75     | $Q_2$      | 75     |
| $J_1$      | 2      | $J_2$      | 1      |
| $d_1$      | 0.25   | $d_2$      | 0.25   |
| $R_1$      | 7.5    | $k_{02}$   | 0.062  |
|            |        | $I_{SA}$   | 0.3    |
|            |        | $N_{cp2}$  | 7.5    |

Table S2: Parameter Values for the Synthetic Gene Circuit with a Constitutive and Self-activation Modules, with  $kg_0 = 4$

| Module 1   |        | Module 2   |        |
|------------|--------|------------|--------|
| Parameters | Values | Parameters | Values |
| $v_1$      | 0.67   | $v_2$      | 0.67   |
| $Q_1$      | 3      | $Q_2$      | 3      |
| $J_1$      | 4      | $J_2$      | 4      |
| $d_1$      | 0.25   | $d_2$      | 0.25   |
| $k_{01}$   | 0.025  | $k_{02}$   | 0.025  |
| $I_{SA1}$  | 0.3    | $I_{SA2}$  | 0.3    |
| $N_{cp1}$  | 10     | $N_{cp2}$  | 10     |

Table S3: Parameter Values for the Synthetic Gene Circuit with Two Self-activation Modules, with  $k_{g0} = 2$

#### 4. Supplementary Figures

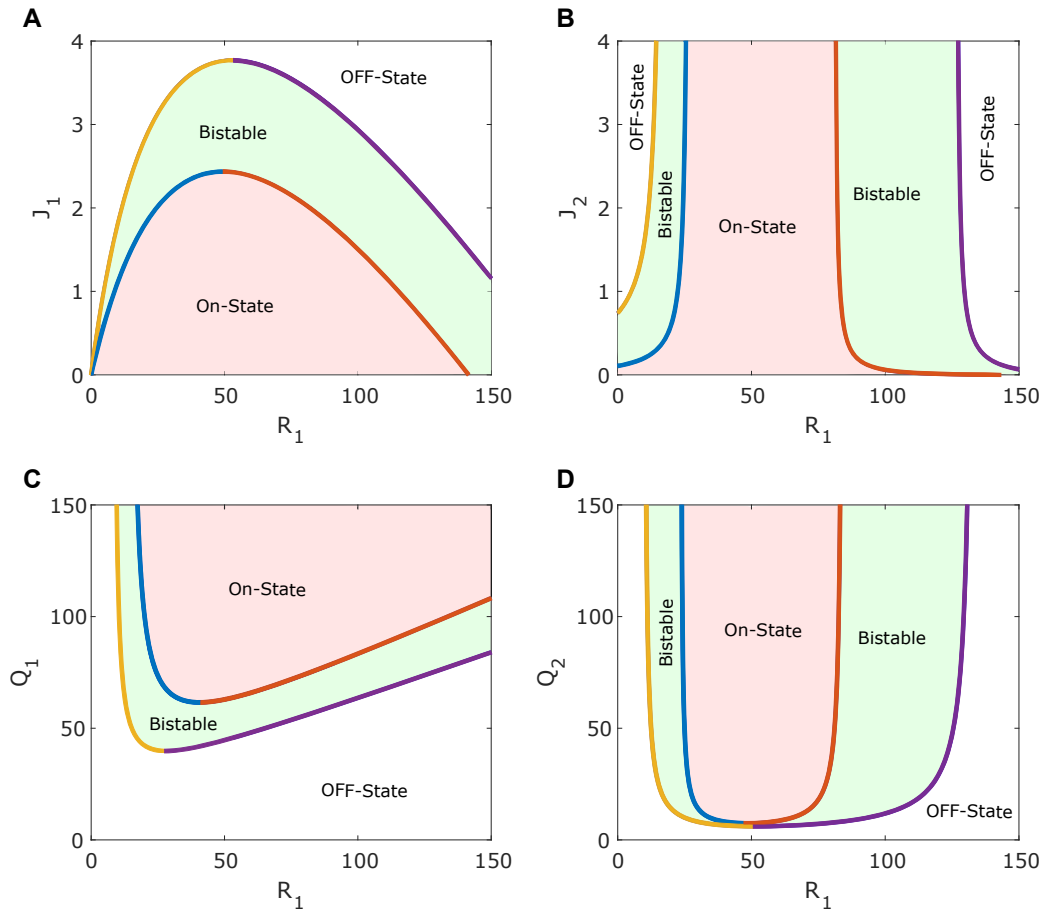

Figure S1: Analysis of the synthetic gene circuit with a constitutive and self-activation modules, for  $J_1 \neq J_2$  and  $Q_1 \neq Q_2$ . (A-B) Two-parameter bifurcation diagram with respect to  $J_1$  ( $Q_1$  in (D)) and  $R_1$  shows the dependence of the saddle-nodes (SN1-4). SN1 (blue line), SN2 (orange line), SN3 (yellow line), and SN4 (purple line) correspond to the saddle-node bifurcation points. The red region of the represents the ON-state of  $x_2$  Module. The green region corresponds to the system bistability. White region represents the OFF-state of the  $x_2$  module

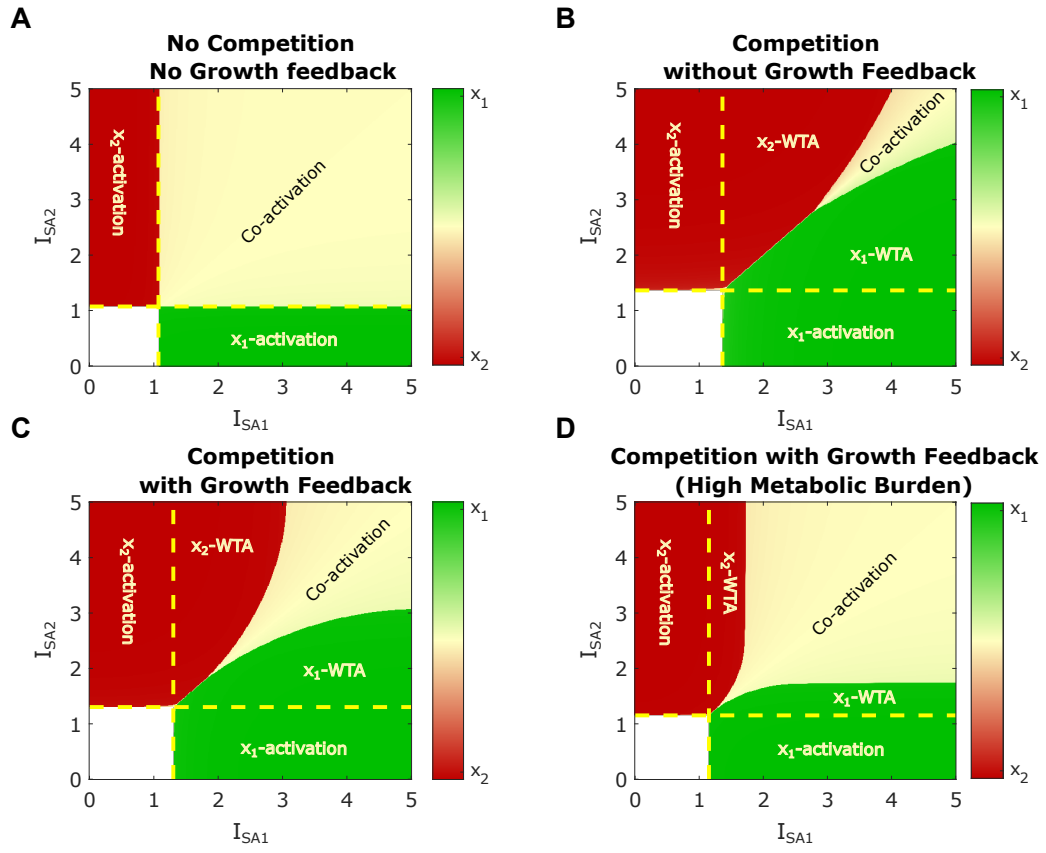

Figure S2: (A-D) Cell fates in the space of inducer  $I_{SA1}$  and  $I_{SA2}$ , starting from OFF-OFF state, under conditions with neither competition nor growth feedback (A), with resource competition and no growth feedback (B); competition with metabolic burden (C) ( $J_1 = J_2 = 15$ ), and high metabolic burden (D) ( $J_1 = J_2 = 4$ ).
